# Supplementary material for: DNA directed immobilization enzyme on polyamidoamine tethered magnetic composites with high reusability and stability
Source: Royal Society of Chemistry journal article supplement (doi:10.1039/c6tb01857b), 2016-01-01
Supplement: c6tb01857b1.pdf [file c6tb01857b1.pdf]

## **Electronic Supplementary Information**

### **DNA directed immobilization enzyme on polyamidoamine tethered magnetic composites with high reusability and stability**

Jiayi Song, Ping Su, Ye Yang, Ting Wang and Yi Yang\*

*Beijing Key Laboratory of Environmentally Harmful Chemical Analysis, College of Science,  
Beijing University of Chemical Technology, Beijing 100029, P.R. China.*

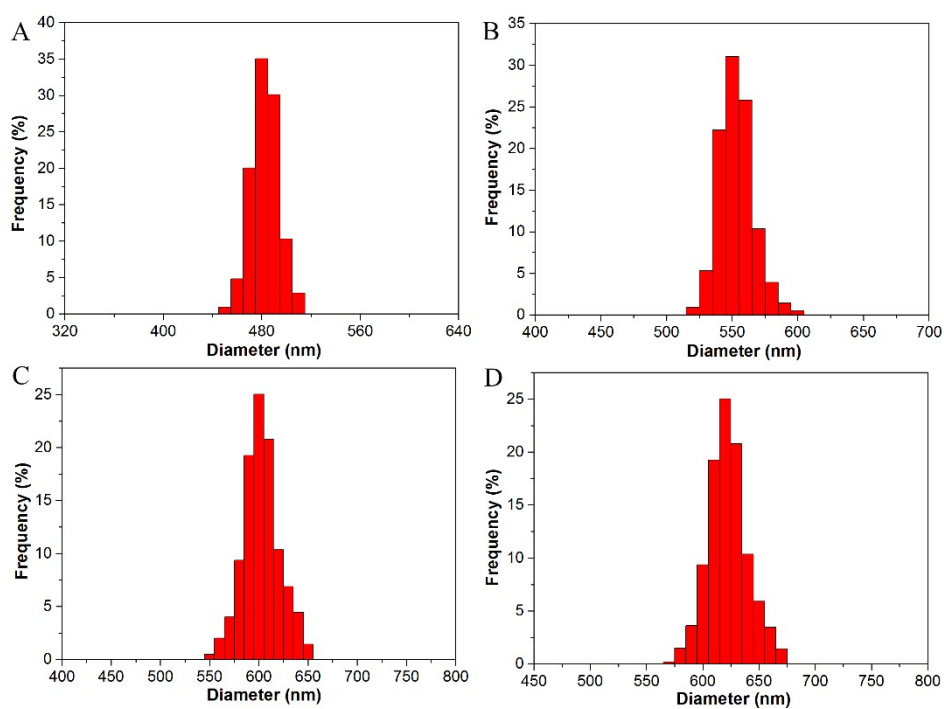

**Fig. S1** Particle size distribution measured by DLS for (A)  $\text{Fe}_3\text{O}_4$ , (B)  $\text{Fe}_3\text{O}_4@\text{SiO}_2$ , (C) MNPs, (D) MNPs@G3.0PAMAM.

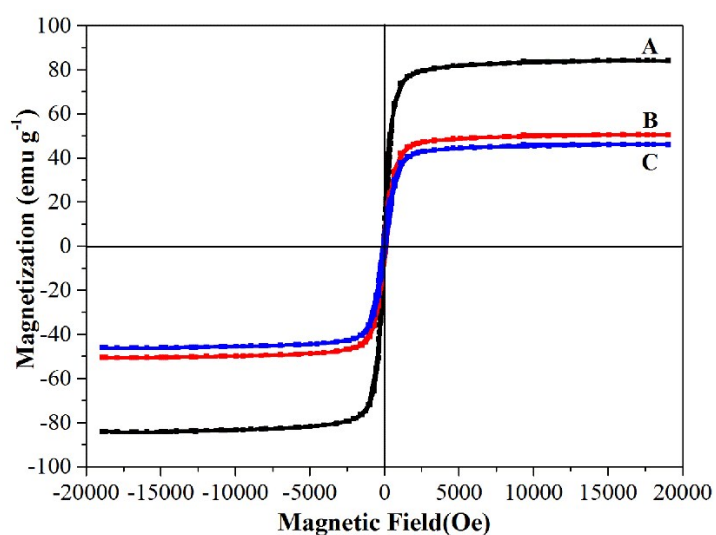

**Fig. S2** Magnetization curves of  $\text{Fe}_3\text{O}_4$  (A), MNPs (B), and MNPs@G3.0PAMAM@DNA-trypsin (C).

**Table S1** Sequences of the DNA oligonucleotides used in the experiments

| Name        | Sequence (from 5' to 3')                                                                |
|-------------|-----------------------------------------------------------------------------------------|
| Capture DNA | C <sub>14</sub> 5'-NH <sub>2</sub> -CTAGCTTGTCGTAA-3'                                   |
|             | C <sub>24</sub> 5'-NH <sub>2</sub> -CTAGCTTGTCGTAATACCAGGGTC-3'                         |
|             | C <sub>34</sub> 5'-NH <sub>2</sub> -CTAGCTTGTCGTAATACCAGGGTCGTAGTAGTCA-<br>3'           |
|             | C <sub>44</sub> 5'-NH <sub>2</sub> -CTAGCTTGTCGTAATACCAGGGTCGTAGTAGTCAG<br>TAGTAGTCA-3' |
| Target DNA  | T <sub>14</sub> 5'-SH- TTACGACAAGCTAG -3'                                               |
|             | T <sub>24</sub> 5'-SH- GACCCTGGTATTACGACAAGCTAG -3'                                     |
|             | T <sub>34</sub> 5'-SH- TGACTACTACGACCCTGGTATTACGACAAGCTAG -3'                           |
|             | T <sub>44</sub> 5'-SH- TGACTACTACTGACTACTACGACCCTGGTATTACG<br>ACAAGCTAG -3'             |

**Table S2** Results of elemental analysis for magnetic materials.

| Compound                                         | N (%) | C (%) | H (%) |
|--------------------------------------------------|-------|-------|-------|
| Fe <sub>3</sub> O <sub>4</sub>                   | 0.01  | 1.95  | 0.495 |
| Fe <sub>3</sub> O <sub>4</sub> @SiO <sub>2</sub> | 0.11  | 2.50  | 0.755 |
| MNPs                                             | 0.3   | 2.97  | 0.902 |
| MNPs@G3.0PAMAM                                   | 1.4   | 4.2   | 1.453 |

For the practical applicability, the enzymatic activity of the immobilized trypsin at optimum temperature, pH, digestion time and the concentration of protein solution have been studied. The temperature and pH are the most important factors affecting the activity of the immobilized enzyme. We investigated the effect of temperature and pH on the activity of the immobilized trypsin and the Cyt-c was chosen as a model protein. As shown in Table S3, the optimum temperature for the immobilized trypsin was 37°C, with the sequence coverage and the number of matched peptides of 78% and 14, respectively. The influence of pH on the activity of the immobilized trypsin was determined in the range of 7.8 to 8.36 (Table S4), maximum activity of the immobilized trypsin was observed at pH value of 8.1. The influence of the digestion time of Cyt-c on activity of the immobilized trypsin is shown in Table S5. The results revealed that the digestion efficiency reached a plateau over 15 min, indicating that 15 min was the optimal digestion time. The optimal concentration of Cyt-C solution for the highest digestion efficiency was 0.25 mg ml<sup>-1</sup> (Table S6). Further increasing the substrate concentration led to a decrease in the digestion efficiency, most likely because of the saturation of the enzyme binding capacity and digestion ability. As shown in Table S7-S10, similar results were also observed using Myo, HbA1c as model protein substrate and the optimal concentration, digestion time of Myo were 0.25 mg ml<sup>-1</sup> (Table S7) and 5 min (Table S8), respectively, and those for HbA1c were 1 mg ml<sup>-1</sup> (Table S9) and 10 min (Table S10), respectively.

**Table S3** Effect of the temperature on the activity of the immobilized trypsin toward Cyt-c (n=3).

| Temperature (°C)      | 20 | 30 | 37 | 50 | 60 |
|-----------------------|----|----|----|----|----|
| Sequence coverage (%) | 39 | 51 | 78 | 62 | 54 |
| Peptides matched      | 7  | 8  | 14 | 11 | 9  |

**Table S4** Effect of the pH on the activity of the immobilized trypsin toward Cyt-c (n=3).

| pH                    | 7.8 | 8.0 | 8.1 | 8.23 | 8.36 |
|-----------------------|-----|-----|-----|------|------|
| Sequence coverage (%) | 70  | 74  | 78  | 69   | 62   |
| Peptides matched      | 12  | 13  | 14  | 12   | 11   |

**Table S5** Effect of the digestion time on the activity of the immobilized trypsin toward Cyt-c

(n=3).

| Digestion time (min)  | 10 | 15 | 30 | 50 | 70 | 90 |
|-----------------------|----|----|----|----|----|----|
| Sequence coverage (%) | 55 | 74 | 72 | 59 | 59 | 52 |
| Peptides matched      | 11 | 13 | 11 | 10 | 10 | 10 |

**Table S6** Effect of the concentration of Cyt-C solution on the activity of the immobilized trypsin

(n=3).

| Concentration (mg ml <sup>-1</sup> ) | 0.0625 | 0.125 | 0.25 | 0.5 | 1  | 2  | 4  |
|--------------------------------------|--------|-------|------|-----|----|----|----|
| Sequence coverage (%)                | 38     | 45    | 78   | 55  | 60 | 60 | 61 |
| Peptides matched                     | 4      | 6     | 14   | 12  | 13 | 9  | 8  |

**Table S7** Effect of the concentration of Myo solution on the activity of the immobilized trypsin

(n=3).

| Concentration (mg ml <sup>-1</sup> ) | 0.125 | 0.25 | 0.5 | 1  | 2  | 4  |
|--------------------------------------|-------|------|-----|----|----|----|
| Sequence coverage (%)                | 95    | 99   | 99  | 99 | 99 | 99 |
| Peptides matched                     | 18    | 20   | 22  | 20 | 20 | 20 |

**Table S8** Effect of the digestion time on the activity of the immobilized trypsin toward Myo (n=3).

| Digestion time (min)  | 1  | 5  | 10 | 15 | 30 | 50 |
|-----------------------|----|----|----|----|----|----|
| Sequence coverage (%) | 90 | 99 | 95 | 99 | 99 | 99 |
| Peptides matched      | 16 | 20 | 20 | 20 | 21 | 20 |

**Table S9** Effect of the concentration of HbA1c solution on the activity of the immobilized trypsin

(n=3).

| Concentration (mg ml <sup>-1</sup> ) | 0.125 | 0.25 | 0.5 | 1  | 2  | 4  |
|--------------------------------------|-------|------|-----|----|----|----|
| Sequence coverage (%)                | 65    | 72   | 79  | 88 | 88 | 88 |
| Peptides matched                     | 8     | 10   | 12  | 16 | 15 | 16 |

**Table S10** Effect of the digestion time on the activity of the immobilized trypsin toward HbA1c

(n=3).

| Digestion time (min)  | 1  | 5  | 10 | 15 | 30 | 50 |
|-----------------------|----|----|----|----|----|----|
| Sequence coverage (%) | 70 | 79 | 88 | 88 | 88 | 88 |
| Peptides matched      | 11 | 13 | 16 | 16 | 14 | 15 |

**Table S11** Comparison of the digestion efficiency of immobilized trypsin nanoparticles (MNPs@G3.0PAMAM@DNA-trypsin) and free trypsin for Cyt-c digestion.

| Position | Mass      | Missed cleavage | Peptide sequence                            | Immobilizd trypsin | Free trypsin |
|----------|-----------|-----------------|---------------------------------------------|--------------------|--------------|
| 10 – 26  | 1992.2317 | 2               | K.IFVQKCAQCHTVEKGGK.H                       | √                  |              |
| 24 – 39  | 1676.0644 | 2               | K.GGKHKTGPNLHGLFGR.K                        | √                  | √            |
| 27 – 39  | 1433.9101 | 1               | K.HKTGPNLHGLFGR.K                           | √                  | √            |
| 27 – 40  | 1562.0248 | 2               | K.HKTGPNLHGLFGRK.T                          | √                  | √            |
| 29 – 39  | 1168.7259 | 0               | K.TGPNLHGLFGR.K                             | √                  | √            |
| 29 – 40  | 1296.8344 | 1               | K.TGPNLHGLFGRK.T                            | √                  | √            |
| 40 – 56  | 1827.0744 | 2               | R.KTGQAPGFSYTDANKNK.G                       | √                  | √            |
| 41 – 54  | 1456.8981 | 0               | K.TGQAPGFSYTDANK.N                          | √                  | √            |
| 41 – 56  | 1698.9713 | 1               | K.TGQAPGFSYTDANKNK.G                        | √                  | √            |
| 57 – 73  | 2010.1405 | 0               | K.GITWGEETLMEYLENPK.K                       | √                  |              |
| 57 – 74  | 2138.2537 | 1               | K.GITWGEETLMEYLENPKK.Y                      | √                  |              |
| 57 – 74  | 2154.2524 | 1               | K.GITWGEETLMEYLENPKK.Y + Oxidation (M)      | √                  |              |
| 57 – 80  | 2813.6771 | 2               | K.GITWGEETLMEYLENPKKYIPGTK.M+ Oxidation (M) | √                  |              |
| 90 – 100 | 1306.8282 | 1               | K.GEREDLIAYLK.K                             | √                  | √            |

**Table S12** Comparison of the digestion efficiency of immobilized trypsin nanoparticles (MNPs@G3.0PAMAM@DNA-trypsin) and free trypsin for Myo digestion.

| Position  | Mass      | Missed cleavage | Peptide sequence                    | Immobilizd trypsin | Free trypsin |
|-----------|-----------|-----------------|-------------------------------------|--------------------|--------------|
| 2 – 17    | 1816.2641 | 0               | M.GLSDGEWQQVLNVWGK.V                | √                  | √            |
| 18 – 32   | 1607.1203 | 0               | K.VEADIAGHGQEVLR.L                  | √                  | √            |
| 33 – 43   | 1271.8759 | 0               | R.LFTGHPETLEK.F                     | √                  |              |
| 33 – 46   | 1662.1329 | 1               | R.LFTGHPETLEKFDK.F                  | √                  |              |
| 33 – 48   | 1937.3283 | 2               | R.LFTGHPETLEKFDKFK.H                | √                  | √            |
| 49 – 57   | 1086.7430 | 1               | K.HLKTEAEMK.A                       | √                  |              |
| 49 – 63   | 1730.1608 | 2               | K.HLKTEAEMKASEDLK.K                 | √                  |              |
| 52 – 64   | 1495.4876 | 2               | K.TEAEMKASEDLKK.H + Oxidation (M)   | √                  |              |
| 65 – 78   | 1379.0849 | 0               | K.HGTVVLTALGGILK.K                  | √                  |              |
| 65 – 79   | 1507.1912 | 1               | K.HGTVVLTALGGILKK.K                 | √                  |              |
| 65 – 80   | 1635.3010 | 2               | K.HGTVVLTALGGILKKK.G                | √                  |              |
| 79 – 97   | 2110.4975 | 2               | K.KKGHHEAELKPLAQSHATK.H             | √                  |              |
| 80 – 97   | 1982.3908 | 1               | K.KGHHEAELKPLAQSHATK.H              | √                  |              |
| 81 – 97   | 1854.2485 | 0               | K.GHHEAELKPLAQSHATK.H               | √                  |              |
| 98 – 103  | 735.6153  | 1               | K.HKIPIK.Y                          | √                  |              |
| 104 – 119 | 1885.3241 | 0               | K.YLEFISDAIIHVLHVK.H+ Oxidation (M) | √                  |              |
| 120 – 134 | 1502.9182 | 0               | K.HPGDFGADAQGAMTK.A                 | √                  |              |
| 135 – 140 | 748.5603  | 0               | K.ALELFR.N                          | √                  | √            |
| 135 – 146 | 1360.9728 | 1               | K.ALELFRNDIAAK.Y                    | √                  | √            |
| 135 – 148 | 1652.2437 | 2               | K.ALELFRNDIAAKYK.E                  |                    | √            |
| 141 – 154 | 1554.1082 | 2               | R.NDIAAKYKELGFQG.                   |                    | √            |
| 147 – 154 | 941.6326  | 1               | K.YKELGFQG                          | √                  | √            |



**Table S13** Comparison of the digestion efficiency of immobilized trypsin nanoparticles (MNPs@G3.0PAMAM@DNA-trypsin) and free trypsin for HbA1c digestion.

| Position  | Mass      | Missed cleavage | Peptide sequence                          | Immobilizd trypsin | Free trypsin |
|-----------|-----------|-----------------|-------------------------------------------|--------------------|--------------|
| 2 – 9     | 952.7872  | 0               | M.VHLTPEEK.S                              | √                  |              |
| 2 – 17    | 1685.4348 | 2               | M.VLSPADKTNVKAAWGK.V                      |                    | √            |
| 2 – 31    | 3162.4729 | 2               | M.VHLTPEEKSAVTALWGKVNVEVGGE<br>ALGR.L     | √                  |              |
| 9 – 32    | 2485.8790 | 2               | K.TNVKAAWGKVGHAHAGEYGAEALER.M             |                    | √            |
| 10 – 31   | 2228.7369 | 1               | K.SAVTALWGKVNVEVGGEALGR.L                 | √                  |              |
| 13 – 32   | 2043.5473 | 1               | K.AAWGKVGHAHAGEYGAEALER.M                 |                    | √            |
| 18 – 32   | 1530.1819 | 0               | K.VGAHAGEYGAEALER.M                       |                    | √            |
| 19 – 31   | 1315.0421 | 0               | K.VNVEVGGEALGR.L                          | √                  |              |
| 32 – 41   | 1275.0745 | 0               | R.LLVVYPWTQR.F                            | √                  |              |
| 42 – 57   | 1834.4083 | 0               | K.TYFPHFDLSHGSAQVK.G                      |                    | √            |
| 42 – 60   | 2059.4833 | 0               | R.FFESFGDLSTPDAVMGNPK.V                   | √                  |              |
| 42 – 60   | 2075.4992 | 0               | R.FFESFGDLSTPDAVMGNPK.V<br>Oxidation (M)  | +<br>√             |              |
| 42 – 61   | 2213.6347 | 1               | K.TYFPHFDLSHGSAQVKGHGK.K                  |                    | √            |
| 42 – 62   | 2286.7314 | 1               | R.FFESFGDLSTPDAVMGNPKVK.A                 | √                  | √            |
| 62 – 93   | 3394.6532 | 2               | K.KVADALTNAVAHVDDMPNALSAL<br>SDLHAHKLR.V  |                    | √            |
| 63 – 83   | 2191.6835 | 2               | K.AHGKVLGAFSDGLAHLNLK.G                   | √                  |              |
| 63 – 91   | 2997.2813 | 0               | K.VADALTNAVAHVDDMPNALSALS<br>DLH<br>AHK.L |                    | √            |
| 63 – 93   | 3266.5310 | 1               | K.VADALTNAVAHVDDMPNALSAL<br>SDLHAHKLR.V   |                    | √            |
| 67 – 83   | 1798.4694 | 1               | K.KVLGAFSDGLAHLNLK.G                      | √                  |              |
| 68 – 83   | 1670.3537 | 0               | K.VLGAFSDGLAHLNLK.G                       | √                  |              |
| 84 – 96   | 1480.2292 | 0               | K.GTFATLSELHCDK.L                         | √                  |              |
| 84 – 105  | 2586.8883 | 1               | K.GTFATLSELHCDKLHVDPENFR.L                | √                  |              |
| 92 – 100  | 1087.9656 | 1               | K.LRVDPVNFK.L                             |                    | √            |
| 122 – 133 | 1379.0851 | 0               | K.EFTPPVQAAYQK.V                          | √                  |              |
| 134 – 145 | 1150.0108 | 0               | K.VVAGVANALAHK.Y                          | √                  |              |
| 134 – 147 | 1450.1969 | 1               | K.VVAGVANALAHKYH                          | √                  |              |
